1 **Title: Targeted antifungal liposomes**

2 **Running Title: Targeted antifungal liposomes**

3

4 Suresh Ambati\*, Aileen R. Ferarro<sup>^</sup>, S. Earl Khang<sup>&</sup>, Xiaorong Lin<sup>^</sup>, Michelle Momany<sup>&</sup>, Zachary

5 Lewis<sup>^</sup>, Richard B. Meagher\*<sup>#</sup>

6 \*Department of Genetics, University of Georgia, Athens, GA. 30602.

7 <sup>^</sup>Department of Microbiology, University of Georgia, Athens, GA. 30602.

8 <sup>&</sup>Fungal Biology Group and Department of Plant Biology, University of Georgia, Athens, GA.

9 30602.

10 <sup>#</sup>Corresponding author, meagher@uga.edu.

11

12 **Research Article prepared for mSphere**

13 **4603/5000 words.**

14

15 **Abstract**

16 *Aspergillus species* cause pulmonary invasive aspergillosis resulting in nearly a hundred  
17 thousand deaths each year. Patients at the greatest risk of developing life-threatening  
18 aspergillosis have weakened immune systems and/or various lung disorders. Patients are  
19 treated with antifungals such as amphotericin B (AmB), casofungin acetate, or triazoles  
20 (itraconazole, voriconazole etc.), but these antifungal agents have serious limitations due to lack  
21 of sufficient fungicidal effect and human toxicity. Liposomes with AmB intercalated into the lipid  
22 membrane (AmBisomes, AmB-LLs), have several-fold reduced toxicity compared to detergent  
23 solubilized drug. However, even with the current antifungal therapies, one-year survival among  
24 patients is only 25 to 60%. Hence, there is a critical need for improved antifungal therapeutics.

25 Dectin-1 is a mammalian innate immune receptor in the membrane of some leukocytes  
26 that binds as a dimer to beta-glucans found in fungal cell walls, signaling fungal infection. Using  
27 a novel protocol, we coated AmB-LLs with Dectin-1's beta-glucan binding domain to make DEC-  
28 AmB-LLs. DEC-AmB-LLs bound rapidly, efficiently, and with great strength *Aspergillus*  
29 *fumigatus* and to *Candida albicans* and *Cryptococcus neoformans*, highly divergent fungal  
30 pathogens of global importance. By contrast, un-targeted AmB-LLs and BSA-coated BSA-AmB-  
31 LLs showed 200-fold lower affinity for fungal cells. DEC-AmB-LLs reduced the growth and  
32 viability of *A. fumigatus* an order of magnitude more efficiently than untargeted control  
33 liposomes delivering the same concentrations of AmB, in essence increasing the effective dose  
34 of AmB. Future efforts will focus on examining pan-antifungal targeted liposomal drugs in animal  
35 models of disease.

36 240/250 words

37

38 **Tweet**

39 We coated anti-fungal drug loaded liposomes to fungal cell walls with a beta-glucan  
40 binding protein and thereby increased drug effectiveness by an order of magnitude.

41 **Importance**

42         The fungus *Aspergillus fumigatus* causes pulmonary invasive aspergillosis resulting in  
43 nearly a hundred thousand deaths each year. Patients are often treated with antifungal drugs  
44 such as amphotericin B loaded into liposomes, AmB-LLs, but all antifungal drugs including  
45 AmB-LLs have serious limitations due to human toxicity and insufficient fungal cell killing. Even  
46 with the best current therapies, one-year survival among patients with invasive aspergillosis is  
47 only 25 to 60%. Hence, there is a critical need for improved antifungal therapeutics.

48         Dectin-1 is a mammalian protein that binds to beta-glucan polysaccharides found in  
49 nearly all fungal cell walls. We coated AmB-LLs with Dectin-1 to make DEC-AmB-LLs. DEC-  
50 AmB-LLs bond strongly to fungal cells, while AmB-LLs had little affinity. DEC-AmB-LLs killed or  
51 inhibited *A. fumigatus* ten times more efficiently than untargeted liposomes, increasing the  
52 effective dose of AmB. Dectin-1 coated liposomes targeting fungal pathogens have the potential  
53 to greatly enhance antifungal therapeutics.

54         147/150 words

55

56

## 57 **Introduction**

58 ***Invasive fungal infections.*** Hundreds of species of indigenous fungi cause a wide variety  
59 of diseases including aspergillosis, blastomycosis, candidiasis, cryptococcosis,  
60 coccidioidomycosis (valley fever), and *Pneumocystis pneumonia* (PCP). Collectively pathogenic  
61 fungi infect many different organs, but lungs are the most common site for deep mycoses.  
62 Globally aspergillosis, candidiasis, and cryptococcosis kill about one million or more people  
63 each year (1, 2).

64 *Aspergillus fumigatus* and related *Aspergillus species* cause aspergillosis (2). Patients at  
65 the greatest risk of developing life-threatening aspergillosis have weakened immune systems,  
66 for example, from stem cell transplants or organ transplants or have various lung diseases,  
67 including tuberculosis, chronic obstructive pulmonary disease, cystic fibrosis, or asthma. Among  
68 immunocompromised patients, aspergillosis is the second most common fungal infection, after  
69 candidiasis (3, 4). Additional costs associated with treating invasive aspergillosis are estimated  
70 at \$40,000 per child and \$10,000 per adult. Patients with aspergillosis are treated with  
71 antifungals such as amphotericin B, caspofungin or triazoles. Even with antifungal therapy,  
72 however, one-year survival among immunocompromised patients with aspergillosis is only 25 to  
73 60%. Furthermore, all known antifungal agents that treat aspergillosis are quite toxic to human  
74 cells(5, 6). The goal of our research has been to develop a targeted liposomal strategy that  
75 improves antifungal drug delivery and enhances therapeutic efficacy.

76 ***Liposomal AmB.*** Amphotericin B (AmB) is the most commonly used agent for many kinds  
77 of fungal infections, including aspergillosis. Because AmB binds the fungal plasma membrane  
78 sterol ergosterol more efficiently than the mammalian sterol cholesterol, AmB is more toxic to  
79 fungal cells. The side effects of Amphotericin B include neurotoxicity and/or nephrotoxicity  
80 and/or hepatotoxicity (5, 6) and can result in death of the patient (1).

81 Amphotericin B loaded liposomes, AmB-LLs, penetrate more efficiently to various organs  
82 (7, 8), penetrate the cell wall (9) and show reduced toxicity at higher, more effective doses of

83 AmB than the second most commonly used AmB product, deoxycholate detergent-solubilized  
84 AmB (5, 6, 10, 11). AmB is an amphipathic molecule. Its long lipophilic polyene end intercalates  
85 into the lipid bilayer of liposomes, while its hydrophilic end is positioned on the liposomal surface  
86 as modeled in **Fig. 1**. Commercial untargeted spherical AmB-LLs are called AmBisomes (12,  
87 13). However, AmB-LLs still produce AmB human toxicity, such as renal toxicity in 50% of  
88 patients (5, 6, 11). When infected mice are treated with AmB-LLs, viable numbers of *A.*  
89 *fumigatus* cells in homogenized lung tissue were only reduced by 70% (14, 15), leaving large  
90 fungal cell populations behind. This large residual fungal population may result in recurrence  
91 and subsequent mortality after treatment. We explored the targeting of AmB-LLs to *Aspergillus*  
92 *fumigatus* cells to meet the pressing need to improve the quality of antifungal drug formulations  
93 (1).

94 **Targeted liposomes.** Liposomes biochemically resemble endogenous exosomes (16-18).  
95 They efficiently penetrate the endothelial barrier and reach target cells deep in most major  
96 organs for the “passive delivery” of variously loaded therapeutic drugs (19-23). Targeted-  
97 liposomes have binding specificity for a plasma membrane antigen to enable the “active  
98 delivery” of a packaged therapeutic to diseased cells. Targeting is most commonly achieved  
99 with a monoclonal antibody such that immunoliposomes bind a specific cell type or types. Over  
100 100 publications, most focused on particular types of cancer cells, show that targeted  
101 immunoliposomes improve the cell-type specificity of drug delivery and reduce toxicity.  
102 Therapeutic drug loaded immunoliposomes include those targeting cells expressing the VEGF-  
103 Receptors-2 and -3 (24), the oxytocin receptor(25), the epidermal growth factor receptor, EGFR  
104 (26), CD4 (27), and HER2 (28, 29). The active delivery of immunoliposomes generally improves  
105 cell-type specificity and drug effectiveness by 3- to 10-fold (25, 30, 31) over passive delivery. A  
106 wide variety of drugs have been delivered via targeted liposomes including toxins such as  
107 doxorubicin, paclitaxel and rapamycin (32, 33), growth hormones such as Transforming Growth  
108 Factor-beta (34), and analgesics such as the indomethacin (25). We are unaware of any reports

109 of immunoliposomes specifically targeting antifungals to invasive fungal cells, however, the  
110 immuno-targeting of AmB loaded liposomes to the vessel wall of pulmonary capillary cells in *A.*  
111 *fumigatus* infected mouse lungs results in increased mouse survival rates (15). Our  
112 experimental hypothesis is that AmB-LLs targeted directly to the cell wall of *A. fumigatus* will  
113 have enhanced antifungal activity over current untargeted AmB-LLs.

114 ***Dectin-1 binds beta-glucans on the surface of pathogenic fungi.*** Dectin-1 is  
115 transmembrane receptor expressed in natural killer lymphocytes encoded by the *CLEC7A* (*C-*  
116 *Type Lectin Domain Containing 7A, beta-Glucan Receptor*) gene in mice and humans. Dectin-1  
117 binds various beta-glucans in fungal cell walls and is the primary receptor for transmembrane  
118 signaling of the presence of cell wall components from the surface of fungal cells, stimulating an  
119 innate immune response (35-38). Human and mouse Dectin-1 are 244 and 247 amino acid-long  
120 plasma membrane proteins, respectively, although there are mRNA splice variants producing  
121 shorter human isoforms. Dectin-1 floats in the membrane as a monomer, but binds to beta-  
122 glucans as a dimer as modeled in our design of Dectin-1 targeted liposomes shown in **Fig. 1**  
123 (39). The 176 amino acid long (20 kDa) extracellular C-terminal, beta-glucan binding domain is  
124 often manipulated alone as sDectin-1. The beta 1→3 glucans are a structurally diverse class of  
125 polysaccharides, and as such, sDectin-1 binds various beta-glucans differentially with IC50s  
126 ranging from 2.6 mM to 2.2 pM (38). sDectin-1 is reported to recognize *A. fumigatus* cell wall  
127 components much more efficiently on germinating conidia and germ tubes than on dormant  
128 conidia or mature hyphae (40, 41). Having pan-fungal binding activity, Dectin-1 may provide  
129 broader antifungal targeting abilities for liposomes than a monoclonal antibody (42).

130

## 131 **Results**

132 ***Preparation of amphotericin B loaded sDectin-1 coated liposomes.*** Pegylated  
133 liposomes were remotely loaded with 11 moles percent AmB relative to moles of liposomal lipids

134 to make control AmB-LLs, which are similar in structure and AmB concentration to commercial  
135 un-pegylated AmBisomes (**Materials and Methods, Supplemental Table S1**). sDectin-1 (DEC,  
136 **Supplemental Fig. S1, Fig. S2**) and Bovine serum albumin (BSA) were coupled to a pegylated  
137 lipid carrier, DSPE-PEG. One mole percent DSPE-PEG-DEC was incorporated into AmB-LLs to  
138 make sDectin-1 coated DEC-AmB-LLs (**Fig. 1**) and 0.33 mole percent DSPE-PEG-BSA was  
139 incorporated into AmB-LLs to make BSA-AmB-LLs. This mole ratio of 22 kDa sDectin-1 and 65  
140 kDa BSA results in equivalent  $\mu\text{g}$  amounts of protein coating each set of liposomes. Because  
141 these protein coated liposomes were made from the same AmB-LLs, all three liposomal  
142 preparations contain 11 moles percent AmB relative to moles of lipid. Two moles percent of  
143 DHPE-Rhodamine were loaded into all three classes of liposome (**Fig. 1**).

144 ***sDectin-1 coated liposomes DEC-AmB-LLs bind strongly to fungal cells.*** In assays  
145 performed on *A. fumigatus* germlings, rhodamine red fluorescent DEC-AmB-LLs bound strongly  
146 to germinating conidia and to germ tubes as shown in **Fig. 2**. The sDectin-1-targeted liposomes  
147 often bound in large numbers and in aggregates to particular regions. While 100 nm liposomes  
148 are too small to be resolved by light microscopy, individual liposomes are visible as somewhat  
149 uniformly sized small red fluorescent dots (orange arrows, **Fig. 2A**), which are easily detected  
150 due to their each containing an estimated 3,000 rhodamine molecules (**Fig. 1**). From  
151 examinations of larger fields of germlings it appears that essentially all bind DEC-AmB-LLs (**Fig.**  
152 **2C and 2D**). AmBisome-like AmB-LLs (**Fig. 2B**) and bovine serum albumin coated liposomes,  
153 BSA-AmB-LLs (**Fig. 2E & 2F**) did not bind detectably to germinating conidia or germtubes,  
154 when tested at the same concentration. Maximum labeling by DEC-AmB-LLs was achieved  
155 within 15 to 30 min and the strong red fluorescent signals of DEC-AmB-LLs bound to cells were  
156 maintained for weeks, when fixed cells were stored in the dark in PBS at 4°C.

157 DEC-AmB-LLs also bound to germinating conidia and most hyphae from more mature  
158 cultures as shown in **Fig. 3**. Again, the sDectin-1-targeted liposomes often bound in aggregates,  
159 but some fairly uniformly sized individual small red dots are visible (orange arrows, **Fig. 3A**),

160 which appear to be individual fluorescent liposomes. AmB-LLs did not bind significantly to older  
161 conidia or mature hyphae (**Fig. 3E & 3F**) nor did BSA-AmB-LLs.

162 On plates covered with dense layers of mature hyphae, the number of bound liposomes  
163 and liposome aggregates were counted in multiple fluorescent images. DEC-AmB-LLs bound to  
164 both formalin fixed (**Fig. 4A-C**) and live (**Fig. 4D-F**) *A. fumigatus* cells 100- to 200-fold more  
165 efficiently than AmB-LLs or BSA-AmB-LLs. Labeling by DEC-AmB-LLs was inhibited 50-fold by  
166 the inclusion of soluble beta-glucan, laminarin, but not sucrose, confirming that binding was  
167 beta-glucan specific (**Fig. 4G-4I**). Finally, DEC-AmB-LLs labeled *Cryptococcus neoformans*  
168 cells and *Candida albicans* pseudohyphae (**Supplemental Fig. S3**), while control liposomes did  
169 not. In short, Dectin-coated Amphotericin B loaded liposomes bound efficiently to a variety of  
170 fungal cells, while control liposomes did not.

171 ***Killing and growth inhibition of fungi by DEC-AmB-LLs.*** We performed various  
172 fungal cell growth and viability assays, after treating *A. fumigatus* with liposomes delivering AmB  
173 concentrations near its estimated ED50 of 2 to 3 uM AmB (43) or below its estimated MIC of 0.5  
174 uM for various strains of *A. fumigatus* (44). In most of these experiments, 4,500 conidia were  
175 germinated and incubated for 12 to 72 hr in 96 well microtiter plates along with drug loaded  
176 liposomes. Longer incubation times were often needed to resolve differences among the  
177 liposome preparation delivering higher concentrations of AmB. **Fig. 5** shows that targeted DEC-  
178 AmB-LLs killed or inhibited the growth of *A. fumigatus* cells far more efficiently than BSA-AmB-  
179 LLs or uncoated AmB-LLs delivering the same concentrations of AmB. Assays with CellTiter-  
180 Blue reagent, which assesses cytoplasmic reductase activity as a proxy for cell integrity and  
181 viability, showed that treating cells with DEC-AmB-LLs delivering 3 uM AmB killed *A. fumigatus*  
182 more than an order of magnitude more effectively than AmBisome-like AmB-LLs or BSA coated  
183 liposomes BSA-AmB-LL (**Fig. 5A**). As a second method to score liposomal AmB activity, we  
184 measured hyphal length. Hyphal length assays gave a similar result, showing that DEC-AmB-  
185 LLs delivering 3 uM AmB were far more effective at inhibiting hyphal growth than AmB-LLs or



186 BSA-AmB-LLs (**Fig 5B**). In a complete biological replicate experiment with an independent  
187 slightly different method of preparing liposomes we obtained a similar although less dramatic  
188 result, when delivering 3  $\mu$ M AmB (**Fig. 5C and 5D**).

189 A third assay of liposomal AmB activity was employed, which measured the percent of  
190 conidia that germinated in the presence of the various liposomal preparations (**Fig. 5E and 5F**).  
191 DEC-AmB-LLs delivering as little as 0.09  $\mu$ M and 0.187  $\mu$ M AmB inhibited the germination of *A.*  
192 *fumigatus* conidia significantly better than AmB-LLs or BSA-AmB-LL. The dose response to  
193 DEC-AmB-LL was based on a germination assay performed after a fixed period of growth using  
194 AmB concentrations from 0.09 to 3  $\mu$ M is shown in **Fig. 5G**. DEC-AmB-LLs outperform AmB-  
195 LLs and BSA-AmB-LLs over a wide range of concentrations.

196 ***Reduced animal cell toxicity of DEC-AmB-LLs.*** AmB-LLs and AmB deoxycholate  
197 micelles were slightly more toxic to HEK293 human embryonic kidney cells than DEC-AmB-LLs  
198 or BSA-AmB-LLs based on CellTiter-Blue assays of cell viability (**Supplemental Fig. S4**).

199

## 200 **Discussion**

201 We demonstrated that sDectin-1 targeted DEC-AmB-LLs are significantly more effective at  
202 binding to and inhibiting the growth of fungal cells and are slightly less toxic to human cells than  
203 uncoated AmB-LLs. The biochemical manipulation of mouse or human sDectin-1 has been  
204 complicated, because the proteins easily aggregate and become insoluble and inactive in  
205 aqueous buffers. This problem is perhaps in part, because they are composed of 11 to 13%  
206 hydrophobic amino acids and contain three disulfide crosslinks in their carbohydrate recognition  
207 domains. A wide variety of protein chemical manipulations have been applied to improve  
208 sDectin-1 solubility with mixed success. For example, the solubility and utility of sDectin-1 was  
209 increased by tethering it to the 56 amino acid long B1 domain of Streptococcal Protein G (45) or  
210 more commonly to the 232 a.a. long Fc constant region of IgG1 antibody (41). Bacterially  
211 produced non-glycosylated sDectin-1 renatured from inclusion bodies and de-glycosylated and

212 native mammalian cell produced sDectin-1 all retain indistinguishable beta-glucan binding  
213 activity (39, 46, 47). Therefore, we proceeded with sDectin-1 production in *E. coli*, with the  
214 potential for highest yield and lowest cost. We overcame sDectin-1's solubility problems by  
215 combining a variety of old and new approaches including, (1) the use of a very short charged  
216 peptide tag, (2) the inclusion of 6 M guanidine hydrochloride (GuHCl) during protein extraction,  
217 purification, and chemical modification, (3) the inclusion of the protein solubilizing agent,  
218 arginine, during renaturation, liposomal loading, and storage, and (4) the inclusion of a  
219 sulfhydryl reducing agent BME in all steps.

220 sDectin-1 is reported to bind efficiently to *A. fumigatus* germinating conidia and germ  
221 tubes, but inefficiently if at all to mature hyphae and not at all to un-germinated conidia (40, 41,  
222 48). Our data with sDectin-1 coated AmB loaded liposomes are partially consistent with  
223 previous observations, except that we observed reasonable efficient staining of mature hyphae  
224 (**Fig. 3 & 4**). Poor cell or hyphal binding may be explained by polymorphic expression of beta-  
225 glucans in different stages of fungal cell growth (48, 49). During infection, however, interaction  
226 with host immune cells reportedly expose otherwise masked  $\beta$ -glucans (50), enhancing the  
227 potency of the targeted DEC-AmB-LLs. Herein, sDectin-1 coated fluorescent DEC-AmB-LLs  
228 bound efficiently to germinating conidia, germ tubes, and hyphae, suggesting our modified  
229 sDectin-1 presented on the surface of liposomes retained its ability to form complexes with  
230 affinity for fungal beta-glucans expressed at various stages of growth. Our data showed for the  
231 first time that in vitro chemically modified sDectin-1 (DSPE-PEG-DEC) retained its fungal cell  
232 binding specificity. Furthermore, DEC-AmB-LLs binding was rapid and remained stably bound to  
233 cells for weeks. Perhaps the greater avidity of liposome coated with ~1,500 sDectin-1 molecules  
234 insured the rapid efficient binding and very slow release of bound liposomes, parallel to the  
235 avidity of pentameric IgM antibody. The presence of thousands rhodamine molecules on each  
236 liposome (**Fig. 1**) should have greatly increased the chance of detecting unambiguous

237 fluorescent signals relative to detecting the binding of sDectin-1 dimers as reported in previous  
238 studies.

239 In a large number of experiments using different binding buffers including BSA blocker and  
240 various incubation periods we never detected any significant affinity of uncoated AmB-LLs or  
241 BSA-AmB-LLs for fungal cells, with one exception. In preliminary experiments in which BSA  
242 blocker was omitted during the incubation, we observed BSA-AmB-LLs bound modestly well to  
243 *A. fumigatus* germinated conidia, while we still did not observe AmB-LLs binding. By contrast,  
244 Chavan et al (51) detected efficient binding of fluorescent pegylated liposomes to primary tips  
245 and septa on *A. fumigatus* hyphae even in the presence of serum (51). We cannot account for  
246 this disparity between their data and ours, except that their liposomes had a different lipid  
247 composition and lacked both sDectin-1 and amphotericin B (**Supplemental Table S1**).

248 *Aspergillus*, *Candida* and *Cryptococcus* species belong to three evolutionarily disparate  
249 groups of fungi, the Hemiascomycetes, Euascomycetes, and Hymenomycetes, respectively,  
250 which are separated from common ancestry by hundreds of millions of years (52). DEC-AmB-  
251 LLs bound specifically to all three. This suggests the beta-glucans found in the outer cell wall of  
252 many pathogenic fungi will be conserved enough in structure and accessible enough bind  
253 sDectin-1 targeted liposomes.

254 In various biological and experimental replicate experiments using different assay methods  
255 we showed that DEC-AmB-LLs killed or inhibited *A. fumigatus* cells far more efficiently than  
256 AmBisome-like AmB-LLs delivering the same level of AmB. In all of our experiments, DEC-  
257 AmB-LLs were from several fold to more than an order of magnitude more fungicidal than  
258 control liposomes over a wide variety of AmB concentrations tested that were near or below the  
259 estimated ED50 of 3  $\mu$ M. We detected significantly stronger activity of DEC-AmB-LLs over  
260 AmB-LLs even at AmB concentrations as low as 0.094  $\mu$ M AmB, well below AmB's MIC. DEC-  
261 AmB-LLs significantly decreased the amount of AmB required for an ED50 or a MIC for *A.*  
262 *fumigatus*. The time of incubation with drug loaded liposomes strongly influences the ability to

263 resolve differences among the three liposome preparations. For example, when all three  
264 liposome preparations delivered high AmB concentrations (e.g., 0.75, 1.5 and 3  $\mu\text{M}$ ) they  
265 caused a lag in the germination of conidia. Hence, longer incubation periods were needed to  
266 allow sufficient fungal growth to resolve the improved performance of DEC-AmB-LLs. Short  
267 incubation periods were needed to resolve differences at low AmB concentrations (e.g., 0.37,  
268 0.18, 0.94  $\mu\text{M}$ ). Thus we were unable to obtain a dose response curve that reflected the optimal  
269 performance of DEC-AmB-LLs over a wide range of AmB concentrations.

270 Looking forward, there are a number of important variables we have not yet explored. For  
271 example, we coated liposomes with a single concentration of sDectin-1, approximately 1,500  
272 molecules per liposome and do not know if this is the optimal concentration for cell binding and  
273 drug delivery. Also, although DEC-AmB-LL were superior in all aspects to AmB-LLs we do not  
274 know the ratio of growth inhibition to killing at different AmB concentrations. Efficient killing can  
275 be followed by rapid outgrowth of the remaining cells obscuring the results. This is particularly  
276 relevant to the treatment of aspergillosis, because current drug formulations only partially  
277 reduce the fungal cell load in mice and humans. Finally, an important next step in our research  
278 needs be an examination of the performance sDectin-1 coated antifungal drug loaded  
279 liposomes in animal models of fungal diseases.

280 In summary, sDectin-1 conjugated to a pegylated lipid carrier and inserted as monomers  
281 into liposomes must float together to form functional dimers or multimers as they bind beta-  
282 glucans or we would not have observed the strong efficient binding of DEC-AmB-LLs to fungal  
283 cells. Our DEC-AmB-LLs efficiently bind beta-glucans in the cell walls of diverse fungal species.  
284 Multiple growth and viability assays on DEC-AmB-LLs delivering AmB concentrations from  
285 0.094 to 3  $\mu\text{M}$  suggest that sDectin-1 coated liposomes greatly improved the performance of  
286 liposomal AmB. Taking these results altogether, it is reasonable to propose that sDectin-1  
287 coated liposomes have significant potential as pan-fungal carriers for targeting antifungal  
288 therapeutics.

289

## 290 **Materials and Methods**

291 **Fungal growth.** *Aspergillus fumigatus* strain A1163 was transformed with plasmid  
292 pBV126 described in Kang et al. (53) carrying green fluorescent protein EGFP under the control  
293 of *Magnaporthe oryzae* ribosomal protein 27 promoter to make strain AEK012. AEK012 was  
294 used to monitor fungal cells in some experiments. *A. fumigatus* spores were inoculated on poly-  
295 L-lysine coated plates containing Vogel's Minimal Media (VMM, 1% glucose, 1.5% Agar) and  
296 grown for 7 days, at which time conidia were collected in PBS + 0.1% Tween. For fluorescent  
297 liposome localization and for growth inhibition and killing assays 20,000 and 4,500 AEK012  
298 conidia were plated on 24 well and 96 well plates, respectively, in VMM, 1% glucose, 0.5% BSA  
299 at 35°C for various time periods ranging from 8 hr to 56 hr (54, 55). *Candida albicans* Sc5314  
300 and *Cryptococcus neoformans* H99 were pre-grown in YPD liquid media for overnight. The cells  
301 were then washed 3 times with sterile water and resuspended in VMM media and grown on  
302 poly-L-lysine coated plates at 35°C for 10 hours. All fungal cell growth was carried out in a BSL2  
303 laboratory. Prior to liposomal staining most fungal preparations were washed 3 times with PBS,  
304 fixed in 4% formaldehyde in PBS for 15 to 60 mins, washed twice and stored at 4°C in PBS.

305 **Production of soluble Dectin-1.** The sequence of the codon-optimized *E. coli* expression  
306 construct with MmsDectin-1lyshis (NCBI BankIT #2173810) cloned into pET-45B (GenScript) is  
307 shown in **Supplemental Fig. S1**. The sequence encodes a slightly modified 198 a.a. long  
308 sDectin-1 protein containing a vector specified N-terminal (His)<sub>6</sub> affinity tag, a flexible GlySer  
309 spacer, two lysine residues, another flexible spacer followed by the C-terminal 176 a.a. long  
310 murine sDectin-1 domain. *E. coli* strain BL21 containing the MmsDectin-1-pET45B plasmid were  
311 grown overnight in 1 L of Luria broth without IPTG induction (**Supplemental Fig. S2**). Modified  
312 sDectin-1 was extracted from cell pellets in pH = 8.0, 6 M GuHCl (Fisher BioReagents BP178),  
313 0.1 M Na<sub>2</sub>HPO<sub>4</sub>/NaH<sub>2</sub>PO<sub>4</sub>, 10 mM Triethanolamine, 100 mM NaCl, 5 mM BME, 0.1% Triton-  
314 X100, which was modified from a GuHCl buffer used an earlier study (56). sDectin-1 was bound

315 to a nickel affinity resin (QiaGen, #30210) in this same buffer, washed in same adjusted to pH  
316 6.3, and eluted in this buffer adjusted to pH 4.5. The pH of the eluted protein was immediately  
317 neutralized to pH 7.2 with 1 M pH 10.0 M triethanolamine for long term storage. Forty mg of  
318 greater than 95% pure protein was recovered per liter of Luria broth (**Supplemental Fig. S2**).  
319 Samples of sDectin-1 at 6 ug/uL in this same GuHCl buffer were adjusted to pH 8.3 with 1 M pH  
320 =10 triethanolamine and reacted with a 4-molar excess of DSPE-PEG-3400-NHS (Nanosoft  
321 polymers, 1544-3400) for 1 hr at 23°C to make DSPE-PEG-DEC. Gel exclusion chromatography  
322 on Bio-Gel P-6 acrylamide resin (Bio-Rad #150-0740) in renaturation and storage buffer RN#5  
323 (0.1 M NaH<sub>2</sub>PO<sub>4</sub>, 10 mM Triethanolamine, pH 8.0, 1 M L-Arginine, 100 mM NaCl, 5 mM EDTA,  
324 5 mM BME) removed un-incorporated DSPE-PEG and GuHCl (45, 57). DSPE-PEG-BSA was  
325 prepared from bovine serum albumin BSA (Sigma, A-8022) by the same protocol, minus the  
326 GuHCl from DSPE-PEG labeling buffers and L-Arginine from RN#5 buffer.

327 ***Remote loading of Amphotericin B, sDectin-1, BSA, and Rhodamine into liposomes.***

328 Sterile pegylated liposomes were obtained from FormuMax Sci. Inc. (DSPC:CHOL:mPEG2000-  
329 DSPE, 53:47:5 mole ratio, 100 nm diameter, 60 umole/mL lipid in a liposomal suspension,  
330 FormuMax #F10203A). Small batches of liposomes were remotely loaded with 11 moles  
331 percent Amphotericin B (AmB, Sigma A4888) relative to 100% liposomal lipid to make  
332 AmBisome-like AmB-LLs used throughout this study. For example, AmB (2.8 mg, 3 umoles, 20  
333 moles %) AmB was dissolved in 13 uL DMSO by heating 10 to 20 min and with occasional  
334 mixing at 60°C to make an oil-like clear brown AmB solution. Two hundred and fifty uL of sterile  
335 liposomal suspension (15 umoles of liposomal lipid in 50% liposome suspension) was added to  
336 the AmB-oil and mixed on a rotating platform for 3 days at 37°C, followed by centrifugation for  
337 10min at 100xg to pellet the AmB oil. Dissolving this oil phase in 0.5 mL DMSO and  
338 spectrophotometry at A407 relative to AmB standards in DMSO showed that 1.3 umoles AmB  
339 remained undissolved and 1.7 umoles of AmB (11 moles percent) were retained in liposomes.  
340 Subsequent gel exclusion chromatography of loaded liposomes over a 10 mL BioGel A-0.5 M

341 agarose resin (BioRad 151-0140) revealed no detectable AmB in the salt volume and  
342 essentially all of the AmB was retained by liposomes. Longer incubations resulted in higher  
343 percentages of AmB in liposomes. AmB Commercial AmBisomes® (Gilead) are not pegylated  
344 and contain 10.6 moles percent AmB relative to lipid (**Supplemental Table S1**).

345 The DSPE-PEG-sDectin-1 and DSPE-PEG-BSA conjugates in RN#5 buffer and PBS,  
346 respectively, were integrated via their DSPE moiety into the phospholipid bilayer membrane of  
347 AmB-LLs at 1.0 and 0.33 moles percent of protein relative to moles of liposomal lipid by 60 min  
348 incubation at 60°C to make DEC-AmB-LLs and BSA-AmB-LLs. During this same 60°C  
349 incubation, the red fluorescent tag, Lissamine rhodamine B-DHPE (Invitrogen, #L1392) was  
350 also incorporated at two moles percent relative to liposomal lipid (58-60). Gel exclusion  
351 chromatography on BioGel A-0.5 M resin confirmed that Rhodamine and protein insertion into  
352 liposomes were essentially quantitative. DEC-AmB-LLs stored at 4°C in RN#5 retained fungal  
353 cell binding specificity for 2 months.

354 **Microscopy of liposome binding.** Formalin fixed or live fungal cells were incubated with  
355 liposomes in liposome dilution buffer LDB (PBS pH 7.2, 5% BSA, 1 mM BME, 5 mM EDTA) and  
356 unbound liposomes washed out after 15 min to 2 hr incubation. Images of rhodamine red  
357 fluorescent liposomes, green EGFP *A. fumigatus* and differential interference contrast (DIC)  
358 illuminated cells were taken on microscope slides under oil immersion at 63x on a Leica  
359 DM6000B automated microscope. Five to six Z-stack images were recorded at one micron  
360 intervals and merged in Adobe Photoshop CC2018 using the Linear Dodge method. Bright field  
361 and red and green fluorescent images were taken directly of cells on microtiter plates at 20X  
362 and 40X on an Olympus IX70 Inverted microscope and an Olympus PEN E-PL7 digital camera  
363 and the bright field and/or colored layers merged in Photoshop.

364 **Cell growth and viability assays.** Liposomal stocks were stored at 900 uM AmB and  
365 diluted first 5 to 10-fold into liposome dilution buffer LDB with 0.5% BSA and then into VMM or  
366 LDB with 0.5% BSA for use at the indicated final AmB concentrations. CellTiter-Blue cell viability



367 assays were conducted as per the manufacturer's instructions (Promega, document #G8080)  
368 using 20 uL of resazurin reagent to treat 100 uL of fungal or animal cells in growth media and  
369 incubating for 2 to 4 hours at 37°C. Red fluorescence of electrochemically reduced resorufin  
370 product (Ex485/Em590) was measured in a Biotek Synergy HT microtiter plate reader. Data  
371 from six wells was averaged for each data point and standard errors calculated. Data for  
372 germination and hyphal length assays were collected manually from multiple photographic  
373 images taken at 10X and/or 20X.

374

### 375 **Acknowledgements**

376 We would like to thank Dr. Zachary Wood for his instructive discussions about the  
377 renaturation and stabilization of sDectin-1 and Dr. Bradley Phillips for discussion on the clinical  
378 use of and problems with Amphotericin B. Funding was provided as follows: SA and RBM  
379 (University of Georgia Research Foundation, Inc. UGARF, NIAID R21 AI144498, NIH National  
380 Center for Advancing Translational Sciences #UL1TR002378), ARF (NSF Graduate Research  
381 Fellowship), ZL (RSG-14-184-01-DMC from the American Cancer Society), XL (NIAID  
382 1R01AI140719), MM and SEK (UGA President's Interdisciplinary Seed Grant Program). None  
383 of the authors have any financial conflict of interest.

384

385



386 **Figures**

387 **Fig. 1. Model of DEC-AmB-LLs, liposomes loaded with sDectin-1, amphotericin B, and**

388 **rhodamine.** Amphotericin B (AmB, blue oval structure) was intercalated into the lipid bilayer of  
389 100 nm diameter liposomes. sDectin-1 (DEC, green globular structure) was coupled to the lipid  
390 carrier DSPE-PEG. Both DSPE-PEG-DEC and red fluorescent DHPE-Rhodamine (red star)  
391 were also inserted into the liposomal membrane. sDectin-1, Rhodamine, AmB and liposomal  
392 lipids were in a 1:2:11:100 mole ratio, respectively (Supplemental Table S1). Two sDectin-1  
393 monomers (two DSEP-PEG-DEC molecules) must float together in the membrane to bind  
394 strongly to cell wall beta-glucans (red sugar moieties). The two liposomal controls examined  
395 were BSA-AmB-LLs that containing an equal ug amount of 65 kDa BSA in place of 22 kDa  
396 sDectin-1 (i.e., 0.33:2:11:100 mole ratio) and AmB-LLs lacking any protein coating (0:2:11:100  
397 mole ratio). From these mole ratios, the surface area of an 100 nm diameter liposome, and the  
398 published estimate of  $5 \times 10^6$  lipid molecules per  $10^6 \text{ nm}^2$  of lipid bilayer(61), we estimated that  
399 there were approximately 3,000 Rhodamine molecules in each liposome preparation and 1,500  
400 sDectin-1 monomers in each DEC-AmB-LL. Note that for simplicity the proper ratios of these  
401 molecules are not shown in the figure.

402

403 **Fig. 2. sDectin-1 coated DEC-AmB-LLs bound strongly to germinating conidia and germ**

404 **tubes of *A. fumigatus*, while AmB-LLs and BSA-AmB-LLs did not.** *A. fumigatus* conidia

405 were germinated and grown for 8 to 10 hr in VMM + 1% glucose at 35°C in 24 well microtiter

406 plates before being fixed and stained with fluorescent liposomes. A. Rhodamine red fluorescent

407 DEC-AmB-LLs bound swollen conidia (white arrows) and germ tubes of *A. fumigatus*. B.

408 Rhodamine red fluorescent AmB-LLs did not bind at detectable frequencies. No AmB-LLs were

409 detected even when the red channel was enhanced as in this image. The smallest red dots in

410 plate A represent individual 100 nm diameter liposomes viewed based on their fluorescence

411 (orange arrows). Large clusters of liposomes form the more brightly red stained areas. C and D

412 were stained with DEC-AmB-LLs. E and F stained with BSA-AmB-LLs. A through F. Cells were  
413 grown for 8 to 10 hr in VMM + 1% glucose at 37°C. Labeling was performed in LDB for 60 min.  
414 All three liposomes preparations were diluted 1:100 such that liposomal sDectin-1 and BSA  
415 proteins were at final concentrations of 1 ug/100 uL. Germlings were viewed in the green  
416 channel alone for cytoplasmic fluorescent EGFP expression and red channel for rhodamine  
417 fluorescent liposomes. A and B were photographed at 63X under oil immersion in a compound  
418 fluorescence microscope and red fluorescence was further enhanced in B to detect potentially  
419 individual liposomes. C through F were photographed at 20x on an inverted fluorescence  
420 microscope.

421

422 **Fig. 3. sDectin-1 coated DEC-AmB-LLs bound germinating conidia and hyphae of mature**

423 ***A. fumigatus* cells, while untargeted AmB-LLs and BSA-AmB-LLs did not. *A. fumigatus***

424 conidia were germinated and grown for 16 hr in VMM + 1% glucose at 35°C in 24 well microtiter  
425 plates before being fixed and stained with fluorescent liposomes. A. through D. Cells were  
426 stained with rhodamine red fluorescent DEC-AmB-LL diluted 1:100 such that sDectin-1 was at 1  
427 ug/100 uL, and E. and F. with the equivalent amount of red fluorescent AmB-LLs for 60 min. A.  
428 DIC image alone. B. Combined DIC and red fluorescence image. A and B. show that  
429 Rhodamine fluorescent DEC-AmB-LLs bound to germinating conidia (white arrows) and  
430 hyphae. In B the smallest red dots represent individual 100 nm liposomes (orange arrows). C  
431 through F examined cytoplasmic green fluorescent EGFP and the red fluorescence of  
432 liposomes. C and D show that nearly all conidia and most hyphae stained with DEC-AmB-LLs.  
433 E & F show that AmB-LLs did not bind. A and B were photographed at 63X under oil immersion  
434 and C through F were photographed at 20X on an inverted fluorescent microscope.

435

436 **Fig. 4. sDectin-1-coated DEC-AmB-LLs bound two orders of magnitude more frequently**

437 **to *A. fumigatus* than control AmB-LLs and binding was inhibited by a soluble beta-**

438 **glucan.** Samples of 4,500 *A. fumigatus* conidia were germinated & grown at 35°C for 36 hours  
439 VMM+1% glucose, fixed in formalin or examined live, and incubated for 1 hr with 1:50 dilutions  
440 of liposomes in liposome dilution buffer. Unbound liposomes were washed out. Multiple fields of  
441 red fluorescent images were photographed at 20X and red fluorescence enhanced equivalently  
442 for all images. Each photographic field contained approximately 25 swollen conidia and an  
443 extensive network of hyphae (not shown). A, B, C. Labeling formalin fixed cells. D, E, F.  
444 Labeling live cells. G, H, I. Inhibition of DEC-AmB-LL labeling of fixed cells by 1 mg/mL  
445 laminarin, a soluble beta-glucan vs 1 mg/mL sucrose as a control. A, D, & G. The number of red  
446 fluorescent liposomes and clusters of liposomes were counted, averaged per field and plotted  
447 on a log<sub>10</sub> scale. The numerical average is indicated above each bar and on the vertical axis.  
448 Standard errors are shown. Examples of photographic fields of liposomes used to construct the  
449 adjacent bar graphs are shown in B, C, E, F, H, and I.

450

451 **Fig. 5. DEC-AmB-LLs inhibited the growth *A. fumigatus* far more efficiently than AmB-**  
452 **LLs.** Samples of 4,500 *A. fumigatus* conidia were germinated & grown in 96 well microtiter  
453 plates in Vogel's Minimal Media (VMM+1% glucose) for 8 to 56 hr at 35°C and treated at the  
454 same time with liposome preparations delivering the indicated concentrations of AmB to the  
455 growth media (A-D 3 uM AmB, a 1:300 fold dilution of all three liposome preparations), E. 0.09  
456 uM, F. 0.18 uM, G. 0.9 to 3 uM) or an equivalent amount of liposome dilution buffer. Viability  
457 and growth were estimated using CellTiter-Blue reagent (A and C) or by measuring hyphal  
458 length (B & D) or by scoring percent germination (E, F, and G). Background fluorescence from  
459 wells with CellTiter-Blue reagent in the media, but lacking cells and liposomes was subtracted.  
460 Std. Errors are indicated. Inset photos in B and D show examples of the length of hyphae  
461 assayed for AmB-LLs and DEC-AmB-LL treated sample. One unit of hyphal length in B and D  
462 equals 5 microns. Cells were grown for 8 to 56 hrs. A and B and C and D compare the results

463 from two biological replicate experiments with independently conjugated sDectin-1 and  
464 assembled liposomes.

#### 465 **Supplemental Tables and Figures**

466 **Supplemental Table S1. Liposome compositions.** Comparison of the chemical composition  
467 of liposomes discussed in the manuscript.

468

#### 469 **Supplemental Fig. S1. The modified mouse sDectin-1 DNA *MmsDectin1lyshis* and protein**

470 **MmsDectin-1. A.** The codon optimized DNA sequence of *MmsDECTIN1lyshis* was cloned into  
471 in pET-45B. NCBI BankIT submission #2173810. Length: 577 bp, Vector pET-45b sequence  
472 highlighted in red with start codon underlined, Cloning sites in green, Codons for Gly Ser (G,S)  
473 flexible linker residues in yellow, reactive lys (K) residues in purple, Mouse sDecetin-1 in light  
474 blue, terminal Ala codon in yellow to put stop codons in frame, stop codons in bold. **B.** The  
475 modified mouse sDectin-1 protein being synthesized. N terminus and His tag from pET-45B  
476 vector in red, Gly Ser (GS) flexible linker residues in yellow, reactive lys (K) residues in purple,  
477 Mouse sDecetin-1 in light blue. Final Ala residue/codon to put stop codons and PacI site in  
478 frame. 199 amino acids, MW 22,389.66 g/mole. Theoretical pI 7.74.

479

#### 480 **Supplemental Fig. S2. SDS PAGE analysis of sDectin-1 in cell extracts and after affinity**

481 **purification.** sDectin-1 protein was produced in the BL21 strain of *E. coli* grown in Luria Broth  
482 over night from the pET-45B plasmid without IPTG induction. The protein was solubilized in  
483 GuHCl buffers, purified by Ni-NTA resin and examined by SDS PAGE after GuHCl was  
484 removed by dialysis. Extraction of protein into buffers that also contained reducing agent beta  
485 mercaptoethanol and Triton-X100 detergent greatly increased recovery from insoluble inclusion  
486 bodies (center lanes) relative to buffers without them (right lanes). Protein was examined on an  
487 12% acrylamide gel stained with Coomassie Blue. The approximate molecular weight of

488 modified sDectin-1 22 kDa is indicated. Extraction of these cells with urea buffers even at 60oC  
489 yielded very little protein (not shown).

490

491 **Supplemental Fig. S3. sDectin-coated liposomes, DEC-AmB-LLs, bound strongly to**  
492 ***Candida albicans* and *Cryptococcus neoformans* cells.** A., C. and E. are bright field images  
493 of *C. albicans* strain Sc5314 and *C. neoformans* strain H99 labeled with DEC-AmB-LLs diluted  
494 1:100 in LDB. B., D. and F. are the combined bright field and red fluorescence images showing  
495 that rhodamine red fluorescent DEC-AmB-LLs bound strongly to these cells. Plain uncoated  
496 AmB-LLs and BSA-AmB-LLs did not bind detectably to these cells (not shown). A & B were  
497 photographed at 63X under oil immersion, C through F at 20X on an inverted fluorescent  
498 microscope.

499

500 **Supplemental Fig. S4. sDectin-1 coated DEC-AmB-LLs and BSA coated BSA-AmB-LLs**  
501 **were less toxic to HEK293 cells than uncoated AmB-LLs.** Human Embryonic Kidney  
502 HEK293 cells grown to 30 to 40 percent cell density in RPMI lacking red indicator dye in 96 well  
503 microtiter plates. Cells were treated for 2 hours with the AmB loaded liposomes indicated or a  
504 deoxycholate micelle suspension of AmB (DOC), washed twice and then incubated for  
505 additional 16 hrs. All treatments delivered a final concentration of 30 or 15 uM of AmB into the  
506 media. The 0 uM control wells received an amount of liposome dilution buffer equivalent to the  
507 30 uM treatment. CellTiter-Blue esterase assays estimated cell viability and survival.  
508 Background fluorescence from wells with CellTiter-Blue reagent in the media, but lacking cells  
509 and liposomes was subtracted. Standard errors are indicated.

510

511

512 **References**

513

514 1. **Brown GD, Denning DW, Gow NA, Levitz SM, Netea MG, White TC.** 2012. Hidden  
515 killers: human fungal infections. *Sci Transl Med* **4**:165rv113.

516 2. **CDC.** 2018. Fungal Diseases.

517 <https://www.cdc.gov/fungal/diseases/aspergillosis/definition.html>.

518 3. **Low CY, Rotstein C.** 2011. Emerging fungal infections in immunocompromised  
519 patients. *F1000 Med Rep* **3**:14.

520 4. **Zaoutis TE, Heydon K, Chu JH, Walsh TJ, Steinbach WJ.** 2006. Epidemiology,  
521 outcomes, and costs of invasive aspergillosis in immunocompromised children in the  
522 United States, 2000. *Pediatrics* **117**:e711-716.

523 5. **Dupont B.** 2002. Overview of the lipid formulations of amphotericin B. *J Antimicrob*  
524 *Chemother* **49 Suppl 1**:31-36.

525 6. **Allen U.** 2010. Antifungal agents for the treatment of systemic fungal infections in  
526 children. *Paediatrics & Child Health* **15**:603-608.

527 7. **Lopez-Berestein G, Rosenblum MG, Mehta R.** 1984. Altered tissue distribution of  
528 amphotericin B by liposomal encapsulation: comparison of normal mice to mice infected  
529 with *Candida albicans*. *Cancer Drug Deliv* **1**:199-205.

530 8. **Mehta R, Lopez-Berestein G, Hopfer R, Mills K, Juliano RL.** 1984. Liposomal  
531 amphotericin B is toxic to fungal cells but not to mammalian cells. *Biochim Biophys Acta*  
532 **770**:230-234.

- 533 9. **Walker L, Sood P, Lenardon MD, Milne G, Olson J, Jensen G, Wolf J, Casadevall A,**  
534 **Adler-Moore J, Gow NAR.** 2018. The Viscoelastic Properties of the Fungal Cell Wall  
535 Allow Traffic of AmBisome as Intact Liposome Vesicles. *MBio* **9**.
- 536 10. **Wong-Beringer A, Jacobs RA, Guglielmo BJ.** 1998. Lipid formulations of amphotericin  
537 B: clinical efficacy and toxicities. *Clin Infect Dis* **27**:603-618.
- 538 11. **Tonin FS, Steimbach LM, Borba HH, Sanches AC, Wiens A, Pontarolo R,**  
539 **Fernandez-Llimos F.** 2017. Efficacy and safety of amphotericin B formulations: a  
540 network meta-analysis and a multicriteria decision analysis. *J Pharm Pharmacol*  
541 **69**:1672-1683.
- 542 12. **Stone NR, Bicanic T, Salim R, Hope W.** 2016. Liposomal Amphotericin B  
543 (AmBisome((R))): A Review of the Pharmacokinetics, Pharmacodynamics, Clinical  
544 Experience and Future Directions. *Drugs* **76**:485-500.
- 545 13. **Adler-Moore JP, Proffitt RT.** 2008. Amphotericin B lipid preparations: what are the  
546 differences? *Clin Microbiol Infect* **14 Suppl 4**:25-36.
- 547 14. **Graybill JR, Bocanegra R, Gonzalez GM, Najvar LK.** 2003. Combination antifungal  
548 therapy of murine aspergillosis: liposomal amphotericin B and micafungin. *J Antimicrob*  
549 *Chemother* **52**:656-662.
- 550 15. **Otsubo T, Maruyama K, Maesaki S, Miyazaki Y, Tanaka E, Takizawa T, Moribe K,**  
551 **Tomono K, Tashiro T, Kohno S.** 1998. Long-circulating immunoliposomal amphotericin  
552 B against invasive pulmonary aspergillosis in mice. *Antimicrob Agents Chemother*  
553 **42**:40-44.

- 554 16. **Kooijmans SA, Vader P, van Dommelen SM, van Solinge WW, Schiffelers RM.**  
555 2012. Exosome mimetics: a novel class of drug delivery systems. *Int J Nanomedicine*  
556 **7:1525-1541.**
- 557 17. **Ha D, Yang N, Nadithe V.** 2016. Exosomes as therapeutic drug carriers and delivery  
558 vehicles across biological membranes: current perspectives and future challenges. *Acta*  
559 *Pharm Sin B* **6:287-296.**
- 560 18. **Ragusa M, Barbagallo D, Purrello M.** 2015. Exosomes: nanoshuttles to the future of  
561 *BioMedicine*. *Cell Cycle* **14:289-290.**
- 562 19. **Song YK, Liu F, Chu S, Liu D.** 1997. Characterization of cationic liposome-mediated  
563 gene transfer in vivo by intravenous administration. *Hum Gene Ther* **8:1585-1594.**
- 564 20. **Song YK, Liu F, Chu S, Liu D.** 2008. Characterization of cationic liposome-mediated  
565 gene transfer in vivo by intravenous administration. *Hum Gene Ther* **8:1585-1594.**
- 566 21. **Kamimura K, Liu D.** 2008. Physical approaches for nucleic acid delivery to liver. *AAPS*  
567 *J* **10:589-595.**
- 568 22. **Barua S, Mitragotri S.** 2014. Challenges associated with Penetration of Nanoparticles  
569 across Cell and Tissue Barriers: A Review of Current Status and Future Prospects.  
570 *Nano Today* **9:223-243.**
- 571 23. **Yuan F, Leunig M, Huang SK, Berk DA, Papahadjopoulos D, Jain RK.** 1994.  
572 Microvascular permeability and interstitial penetration of sterically stabilized (stealth)  
573 liposomes in a human tumor xenograft. *Cancer Res* **54:3352-3356.**



- 574 24. **Orleth A, Mamot C, Rochlitz C, Ritschard R, Alitalo K, Christofori G, Wicki A.** 2016.  
575 Simultaneous targeting of VEGF-receptors 2 and 3 with immunoliposomes enhances  
576 therapeutic efficacy. *J Drug Target* **24**:80-89.
- 577 25. **Paul JW, Hua S, Ilicic M, Tolosa JM, Butler T, Smith R.** 2017. Drug Delivery to the  
578 Human and Mouse Uterus using Immunoliposomes Targeted to the Oxytocin Receptor.  
579 *Am J Obstet Gynecol* doi:10.1016/j.ajog.2016.08.027.
- 580 26. **Limasale YD, Tezcaner A, Ozen C, Keskin D, Banerjee S.** 2015. Epidermal growth  
581 factor receptor-targeted immunoliposomes for delivery of celecoxib to cancer cells. *Int J*  
582 *Pharm* **479**:364-373.
- 583 27. **Ramana LN, Sharma S, Sethuraman S, Ranga U, Krishnan UM.** 2015. Stealth anti-  
584 CD4 conjugated immunoliposomes with dual antiretroviral drugs--modern Trojan horses  
585 to combat HIV. *Eur J Pharm Biopharm* **89**:300-311.
- 586 28. **Shigehiro T, Kasai T, Murakami M, Sekhar SC, Tominaga Y, Okada M, Kudoh T,**  
587 **Mizutani A, Murakami H, Salomon DS, Mikuni K, Mandai T, Hamada H, Seno M.**  
588 2014. Efficient drug delivery of Paclitaxel glycoside: a novel solubility gradient  
589 encapsulation into liposomes coupled with immunoliposomes preparation. *PLoS One*  
590 **9**:e107976.
- 591 29. **Cirstoiu-Hapca A, Buchegger F, Lange N, Bossy L, Gurny R, Delie F.** 2010. Benefit  
592 of anti-HER2-coated paclitaxel-loaded immuno-nanoparticles in the treatment of  
593 disseminated ovarian cancer: Therapeutic efficacy and biodistribution in mice. *Journal of*  
594 *Controlled Release* **144**:324-331.

- 595 30. **Mamot C, Drummond DC, Noble CO, Kallab V, Guo Z, Hong K, Kirpotin DB, Park**  
596 **JW.** 2005. Epidermal growth factor receptor-targeted immunoliposomes significantly  
597 enhance the efficacy of multiple anticancer drugs in vivo. *Cancer Res* **65**:11631-11638.
- 598 31. **Koren E, Apte A, Jani A, Torchilin VP.** 2012. Multifunctional PEGylated 2C5-  
599 immunoliposomes containing pH-sensitive bonds and TAT peptide for enhanced tumor  
600 cell internalization and cytotoxicity. *J Control Release* **160**:264-273.
- 601 32. **Schneider M.** 2017. Anti-EGFR-immunoliposomes Loaded With Doxorubicin in Patients  
602 With Advanced Triple Negative EGFR Positive Breast Cancer. *ClinicalTrials.gov*.
- 603 33. **Eloy JO, Petrilli R, Chesca DL, Saggiaro FP, Lee RJ, Marchetti JM.** 2017. Anti-HER2  
604 immunoliposomes for co-delivery of paclitaxel and rapamycin for breast cancer therapy.  
605 *Eur J Pharm Biopharm* **115**:159-167.
- 606 34. **Zheng Y, Tang L, Mabardi L, Kumari S, Irvine DJ.** 2017. Enhancing Adoptive Cell  
607 Therapy of Cancer through Targeted Delivery of Small-Molecule Immunomodulators to  
608 Internalizing or Noninternalizing Receptors. *ACS Nano* **11**:3089-3100.
- 609 35. **Drummond RA, Brown GD.** 2011. The role of Dectin-1 in the host defence against  
610 fungal infections. *Curr Opin Microbiol* **14**:392-399.
- 611 36. **Goodridge HS, Underhill DM, Touret N.** 2012. Mechanisms of Fc receptor and dectin-  
612 1 activation for phagocytosis. *Traffic* **13**:1062-1071.
- 613 37. **Hollmig ST, Ariizumi K, Cruz PD, Jr.** 2009. Recognition of non-self-polysaccharides by  
614 C-type lectin receptors dectin-1 and dectin-2. *Glycobiology* **19**:568-575.
- 615 38. **Adams EL, Rice PJ, Graves B, Ensley HE, Yu H, Brown GD, Gordon S, Monteiro**  
616 **MA, Papp-Szabo E, Lowman DW, Power TD, Wempe MF, Williams DL.** 2008.

- 617 Differential high-affinity interaction of dectin-1 with natural or synthetic glucans is  
618 dependent upon primary structure and is influenced by polymer chain length and side-  
619 chain branching. *J Pharmacol Exp Ther* **325**:115-123.
- 620 39. **Brown J, O'Callaghan CA, Marshall AS, Gilbert RJ, Siebold C, Gordon S, Brown**  
621 **GD, Jones EY.** 2007. Structure of the fungal beta-glucan-binding immune receptor  
622 dectin-1: implications for function. *Protein Sci* **16**:1042-1052.
- 623 40. **Gersuk GM, Underhill DM, Zhu L, Marr KA.** 2006. Dectin-1 and TLRs permit  
624 macrophages to distinguish between different *Aspergillus fumigatus* cellular states. *J*  
625 *Immunol* **176**:3717-3724.
- 626 41. **Steele C, Rapaka RR, Metz A, Pop SM, Williams DL, Gordon S, Kolls JK, Brown**  
627 **GD.** 2005. The beta-glucan receptor dectin-1 recognizes specific morphologies of  
628 *Aspergillus fumigatus*. *PLoS Pathog* **1**:e42.
- 629 42. **Momany M, Lindsey R, Hill TW, Richardson EA, Momany C, Pedreira M, Guest GM,**  
630 **Fisher JF, Hessler RB, Roberts KA.** 2004. The *Aspergillus fumigatus* cell wall is  
631 organized in domains that are remodelled during polarity establishment. *Microbiology*  
632 **150**:3261-3268.
- 633 43. **Monteiro MC, de la Cruz M, Cantizani J, Moreno C, Tormo JR, Mellado E, De Lucas**  
634 **JR, Asensio F, Valiante V, Brakhage AA, Latge JP, Genilloud O, Vicente F.** 2012. A  
635 new approach to drug discovery: high-throughput screening of microbial natural extracts  
636 against *Aspergillus fumigatus* using resazurin. *J Biomol Screen* **17**:542-549.
- 637 44. **Davis SA, Vincent BM, Endo MM, Whitesell L, Marchillo K, Andes DR, Lindquist S,**  
638 **Burke MD.** 2015. Nontoxic antimicrobials that evade drug resistance. *Nat Chem Biol*  
639 **11**:481-487.

- 640 45. **Dulal HP, Nagae M, Ikeda A, Morita-Matsumoto K, Adachi Y, Ohno N, Yamaguchi Y.**  
641 2016. Enhancement of solubility and yield of a beta-glucan receptor Dectin-1 C-type  
642 lectin-like domain in *Escherichia coli* with a solubility-enhancement tag. *Protein Expr*  
643 *Purif* **123**:97-104.
- 644 46. **Gantner BN, Simmons RM, Underhill DM.** 2005. Dectin-1 mediates macrophage  
645 recognition of *Candida albicans* yeast but not filaments. *EMBO J* **24**:1277-1286.
- 646 47. **Ariizumi K, Shen GL, Shikano S, Xu S, Ritter R, 3rd, Kumamoto T, Edelbaum D,**  
647 **Morita A, Bergstresser PR, Takashima A.** 2000. Identification of a novel, dendritic cell-  
648 associated molecule, dectin-1, by subtractive cDNA cloning. *J Biol Chem* **275**:20157-  
649 20167.
- 650 48. **Hohl TM, Van Epps HL, Rivera A, Morgan LA, Chen PL, Feldmesser M, Pamer EG.**  
651 2005. *Aspergillus fumigatus* triggers inflammatory responses by stage-specific beta-  
652 glucan display. *PLoS Pathog* **1**:e30.
- 653 49. **Heinsbroek SE, Brown GD, Gordon S.** 2005. Dectin-1 escape by fungal dimorphism.  
654 *Trends Immunol* **26**:352-354.
- 655 50. **Hopke A, Nicke N, Hidu EE, Degani G, Popolo L, Wheeler RT.** 2016. Neutrophil  
656 Attack Triggers Extracellular Trap-Dependent *Candida* Cell Wall Remodeling and  
657 Altered Immune Recognition. *PLoS Pathog* **12**:e1005644.
- 658 51. **Chavan NL, Young JK, Drezek RA, Lewis R, Bikram M.** 2012. Interactions of  
659 liposome carriers with infectious fungal hyphae reveals the role of beta-glucans. *Mol*  
660 *Pharm* **9**:2489-2496.

- 661 52. **Kuramae EE, Robert V, Snel B, Weiss M, Boekhout T.** 2006. Phylogenomics reveal a  
662 robust fungal tree of life. *FEMS Yeast Res* **6**:1213-1220.
- 663 53. **Khang CH, Park SY, Lee YH, Kang S.** 2005. A dual selection based, targeted gene  
664 replacement tool for *Magnaporthe grisea* and *Fusarium oxysporum*. *Fungal Genet Biol*  
665 **42**:483-492.
- 666 54. **Momany M.** 2001. Chapter 7. Using Microscopy to explore the duplication cycle, p 119-  
667 125. *In* Talbot NJ (ed), *Molecular and cellular biology of filamentous fungi: a practical*  
668 *approach* Oxford University Press, University of Exeter, Exeter, UK.
- 669 55. **Sasaki T, Lynch KL, Mueller CV, Friedman S, Freitag M, Lewis ZA.** 2014.  
670 Heterochromatin controls gammaH2A localization in *Neurospora crassa*. *Eukaryot Cell*  
671 **13**:990-1000.
- 672 56. **Brown J, Esnouf RM, Jones MA, Linnell J, Harlos K, Hassan AB, Jones EY.** 2002.  
673 Structure of a functional IGF2R fragment determined from the anomalous scattering of  
674 sulfur. *EMBO J* **21**:1054-1062.
- 675 57. **Ejima D, Kohei Tsumoto K, Arakawa T.** 2005. Biotech Applications of Arginine: Novel  
676 Uses in Protein Production, Processing, Analysis, and Formulation. *BioProcess*  
677 *Technical Dec.*:20-28.
- 678 58. **Yao L, Daniels J, Wijesinghe D, Andreev OA, Reshetnyak YK.** 2013. pHLLIP(R)-  
679 mediated delivery of PEGylated liposomes to cancer cells. *J Control Release* **167**:228-  
680 237.
- 681 59. **He J, Evers DL, O'Leary TJ, Mason JT.** 2012. Immunoliposome-PCR: a generic  
682 ultrasensitive quantitative antigen detection system. *J Nanobiotechnology* **10**:26.

- 683 60. **Garrett FE, Goel S, Yasul J, Koch RA.** 1999. Liposomes fuse with sperm cells and  
684 induce activation by delivery of impermeant agents. *Biochim Biophys Acta* **1417**:77-88.
- 685 61. **Alberts B, Johnson A, Lewis J, Raff M, Roberts K, Walter P.** 2008. Molecular Biology  
686 of the Cell (5th Edition), p 1539-1600. *In* Edition t (ed), *Molecular Biology of the Cell*.  
687 Garland Science, Taylor and Francis Group, USA.  
688

**Fig. 1. Model of DEC-AmB-LLs, liposomes loaded with sDectin-1, amphotericin B, and rhodamine.** Amphotericin B (AmB, blue oval structure) was intercalated into the lipid bilayer of 100 nm diameter liposomes. sDectin-1 (DEC, green globular structure) was coupled to the lipid carrier DSPE-PEG. Both DSPE-PEG-DEC and red fluorescent DHPE-Rhodamine (red star) were also inserted into the liposomal membrane. sDectin-1, Rhodamine, AmB and liposomal lipids were in a 1:2:11:100 mole ratio, respectively (Supplemental Table S1). Two sDectin-1 monomers (two DSPE-PEG-DEC molecules) must float together in the membrane to bind strongly to cell wall beta-glucans (red sugar moieties). The two liposomal controls examined were BSA-AmB-LLs that containing an equal  $\mu\text{g}$  amount of 65 kDa BSA in place of 22 kDa sDectin-1 (i.e., 0.33:2:11:100 mole ratio) and AmB-LLs lacking any protein coating (0:2:11:100 mole ratio). From these mole ratios, the surface area of a 100 nm diameter liposome, and the published estimate of  $5 \times 10^6$  lipid molecules per  $106 \text{ nm}^2$  of lipid bilayer(62), we estimated that there were approximately 3,000 Rhodamine molecules in each liposome preparation and 1,500 sDectin-1 monomers in each DEC-AmB-LL. Note that for simplicity the proper ratios of these molecules are not shown in the figure.

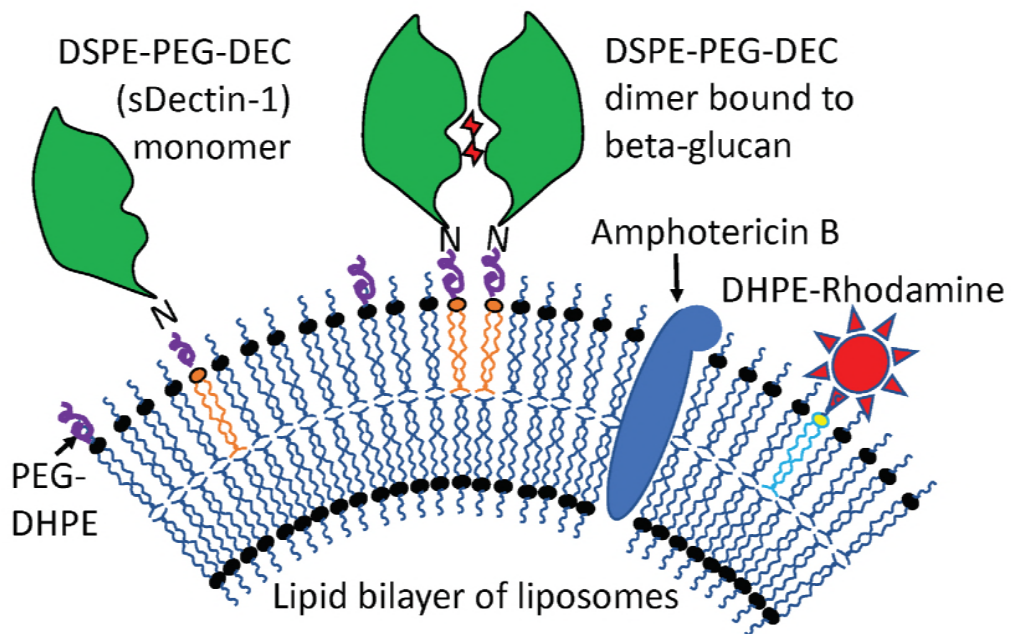



**Fig. 2. sDectin-1 coated DEC-AmB-LLs bound strongly to germinating conidia and germ tubes of *A. fumigatus*, while AmB-LLs did not.** *A. fumigatus* conidia were germinated and grown for 8 to 10 hr in VMM + 1% glucose at 35°C in 24 well microtiter plates before being fixed and stained with fluorescent liposomes. A. Rhodamine red fluorescent DEC-AmB-LLs bound swollen conidia (white arrows) and germ tubes of *A. fumigatus*. B. Rhodamine red fluorescent AmB-LLs did not bind at detectable frequencies. No AmB-LLs were detected even when the red channel was enhanced as in this image. The smallest red dots in plate A represent individual 100 nm diameter liposomes viewed based on their fluorescence (orange arrows). Large clusters of liposomes form the more brightly red stained areas. C and D were stained with DEC-AmB-LLs. E and F stained with BSA-AmB-LLs. A through F. Cells were grown for 8 to 10 hr in VMM + 1% glucose at 37°C. Labeling was performed in LDB for 60 min. All three liposomes preparations were diluted 1:100 such that liposomal sDectin-1 and BSA proteins were at final concentrations of 1 µg/100 µL. Germlings were viewed in the green channel alone for cytoplasmic fluorescent EGFP expression and red channel for rhodamine fluorescent liposomes. A and B were photographed at 63X under oil immersion in a compound fluorescence microscope and red fluorescence was further enhanced in B to detect potentially individual liposomes. C through F were photographed at 20x on an inverted fluorescence microscope.

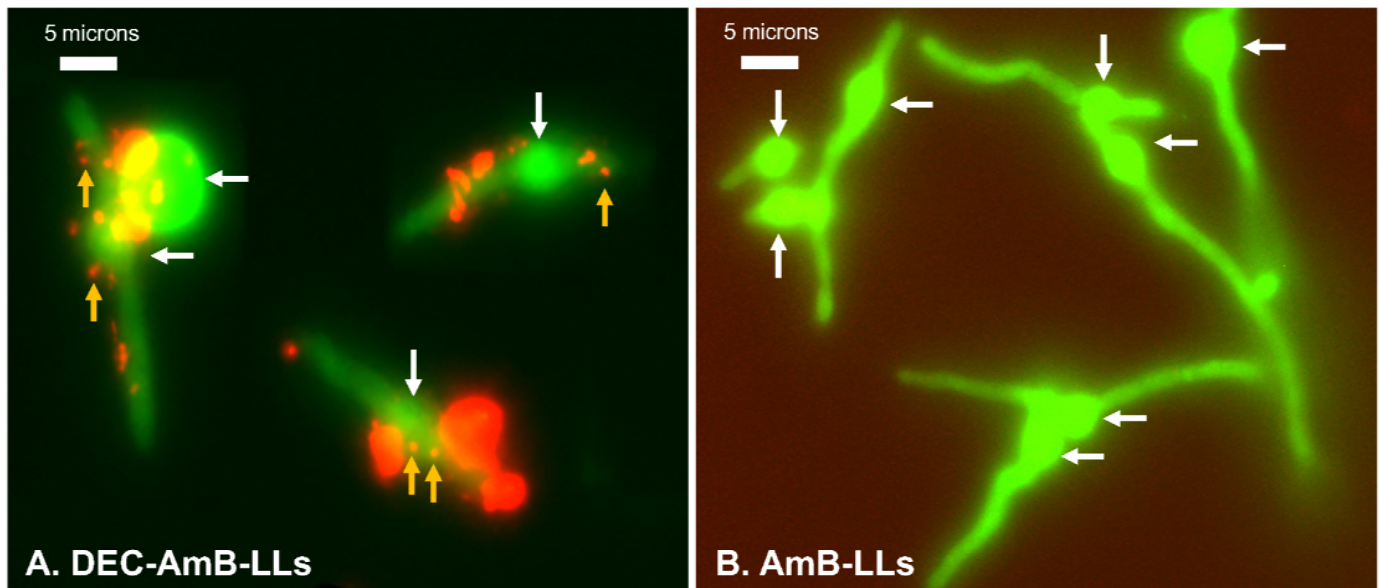



Fig. 2. continued

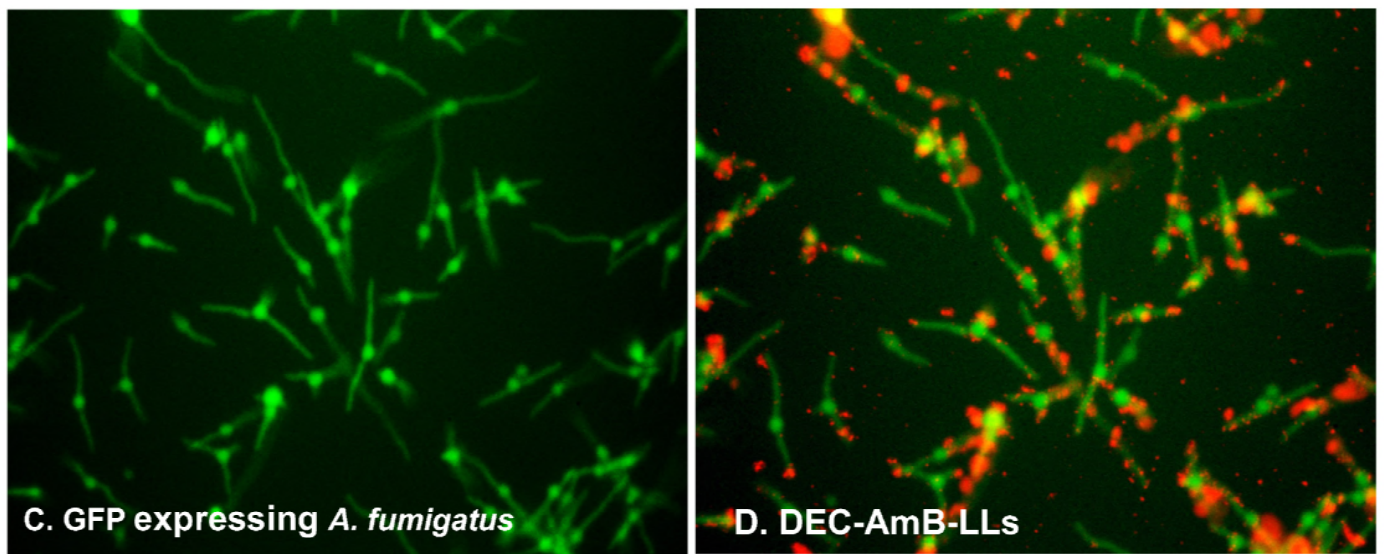

**Fig. 2. continued**

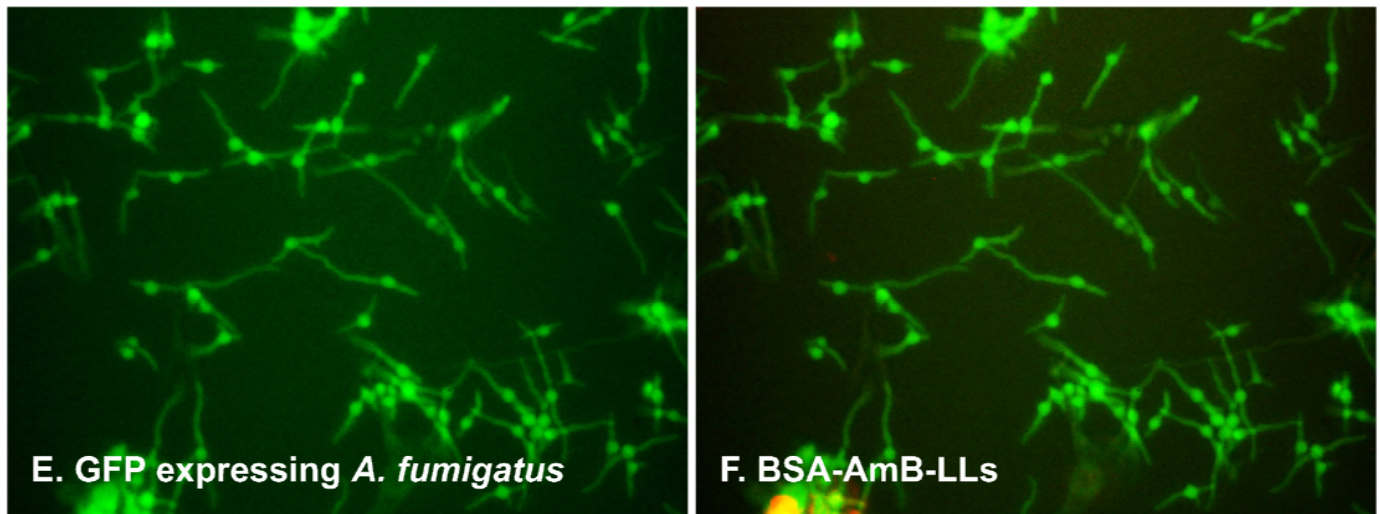

**Figure 3. sDectin-1 coated DEC-AmB-LLs bound swollen conidia and hyphae of mature *A. fumigatus* cells, while untargeted AmBisome-like AmB-LLs did not.** *A. fumigatus* conidia were germinated and grown for 16 hr in VMM + 1% glucose at 35°C in 24 well microtiter plates before staining with fluorescent liposomes. A. through D. Cells were stained with rhodamine red fluorescent DEC-AmB-LL diluted 1:100 such that sDectin-1 was at 1 ug/100 uL, and E. and F. with the equivalent amount of red fluorescent AmB-LLs for 60 min. A. DIC image alone. B. Combined DIC and red fluorescence image. A and B. show that Rhodamine fluorescent DEC-AmB-LLs bound to germinating conidia (white arrows) and hyphae. In B the smallest red dots represent individual 100 nm liposomes (orange arrows). C through F examined cytoplasmic green fluorescent EGFP and the red fluorescence of liposomes. C and D show that nearly all conidia and most hyphae stained with DEC-AmB-LLs. E & F show that AmB-LLs did not bind. A and B were photographed at 63X under oil immersion and C through F were photographed at 20X on an inverted fluorescent microscope.

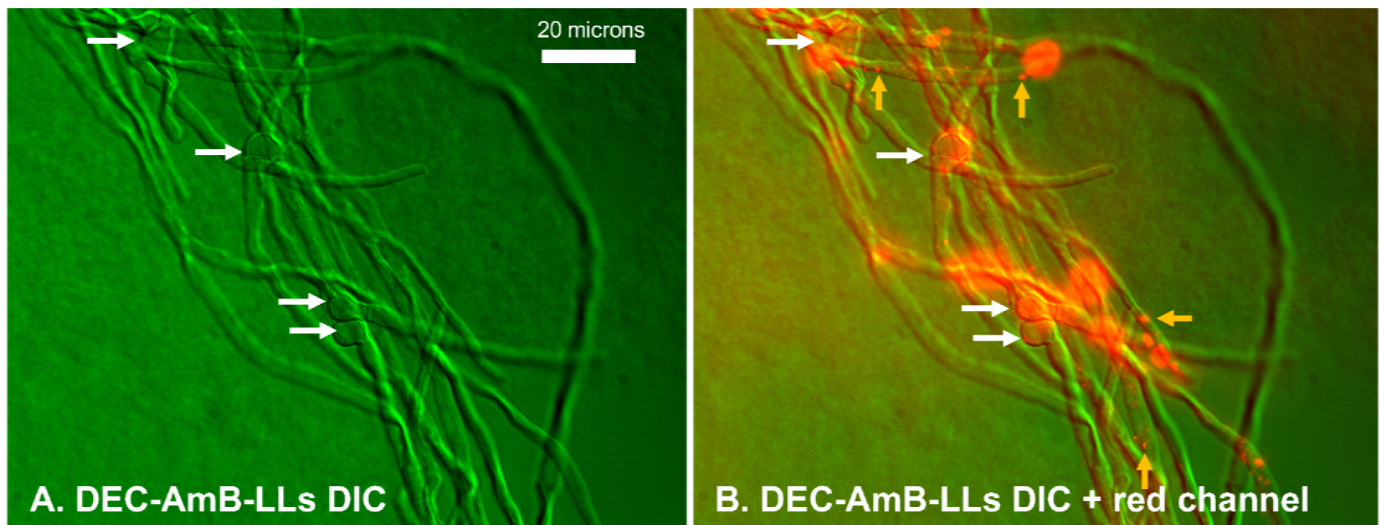

**Fig. 3. continued**

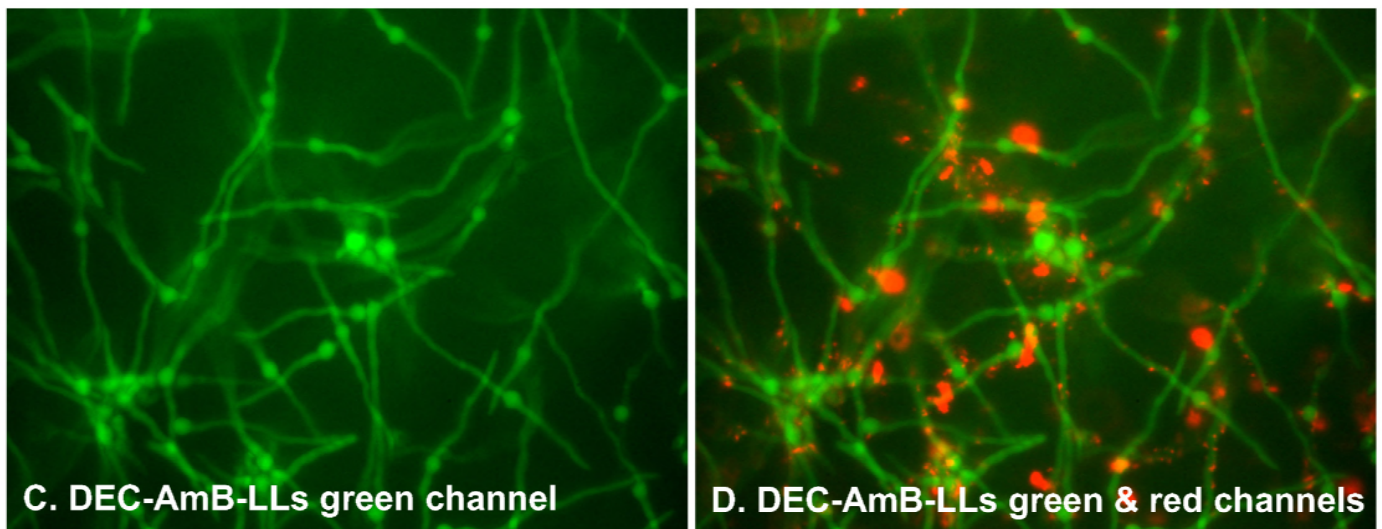



**Fig. 3. continued.**

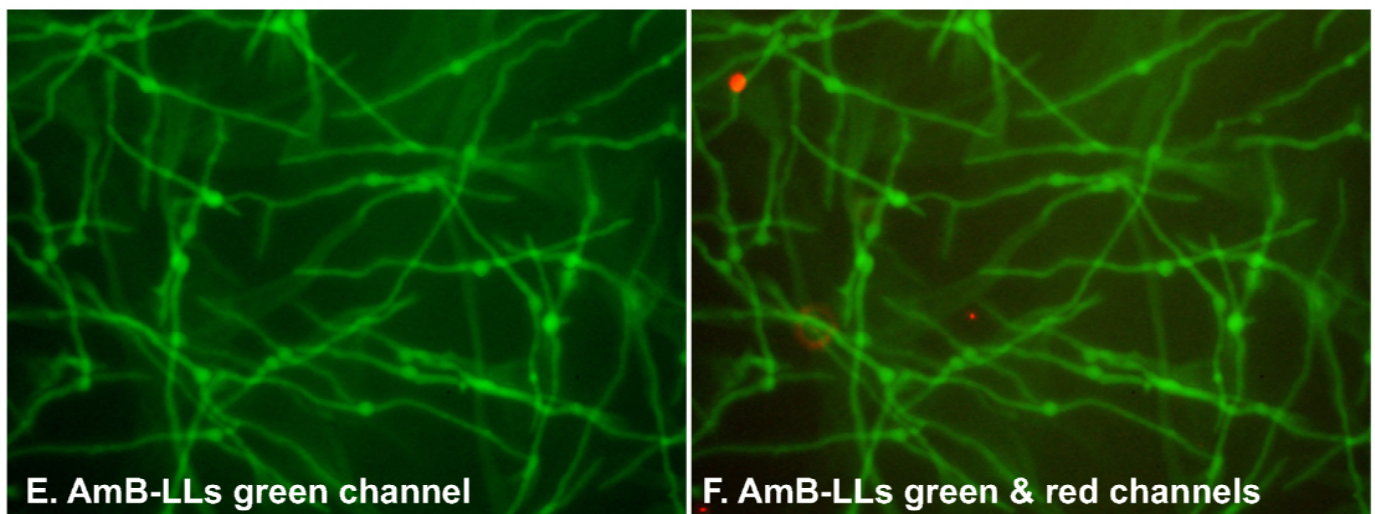

**Fig. 4. sDectin-1-coated DEC-AmB-LLs bound two orders of magnitude more frequently to *A. fumigatus* than control AmB-LLs and binding was inhibited by a soluble beta-glucan.** Samples of 4,500 *A. fumigatus* conidia were germinated & grown at 35°C for 36 hours VMM+1% glucose, fixed in formalin or examined live, and incubated for 1 hr with 1:50 dilutions of liposomes in liposome dilution buffer. Unbound liposomes were washed out. Multiple fields of red fluorescent images were photographed at 20X and red fluorescence enhanced equivalently for all images. Each photographic field contained approximately 25 swollen conidia and an extensive network of hyphae (not shown). A, B, C. Labeling formalin fixed cells. D, E, F. Labeling live cells. G, H, I. Inhibition of DEC-AmB-LL labeling of fixed cells by 1 mg/mL laminarin, a soluble beta-glucan vs 1 mg/mL sucrose as a control. A, D, & G. The number of red fluorescent liposomes and clusters of liposomes were counted, averaged per field and plotted on a log<sub>10</sub> scale. The numerical average is indicated above each bar and on the vertical axis. Standard errors are shown. Examples of photographic fields of liposomes used to construct the adjacent bar graphs are shown in B, C, E, F, H, and I.

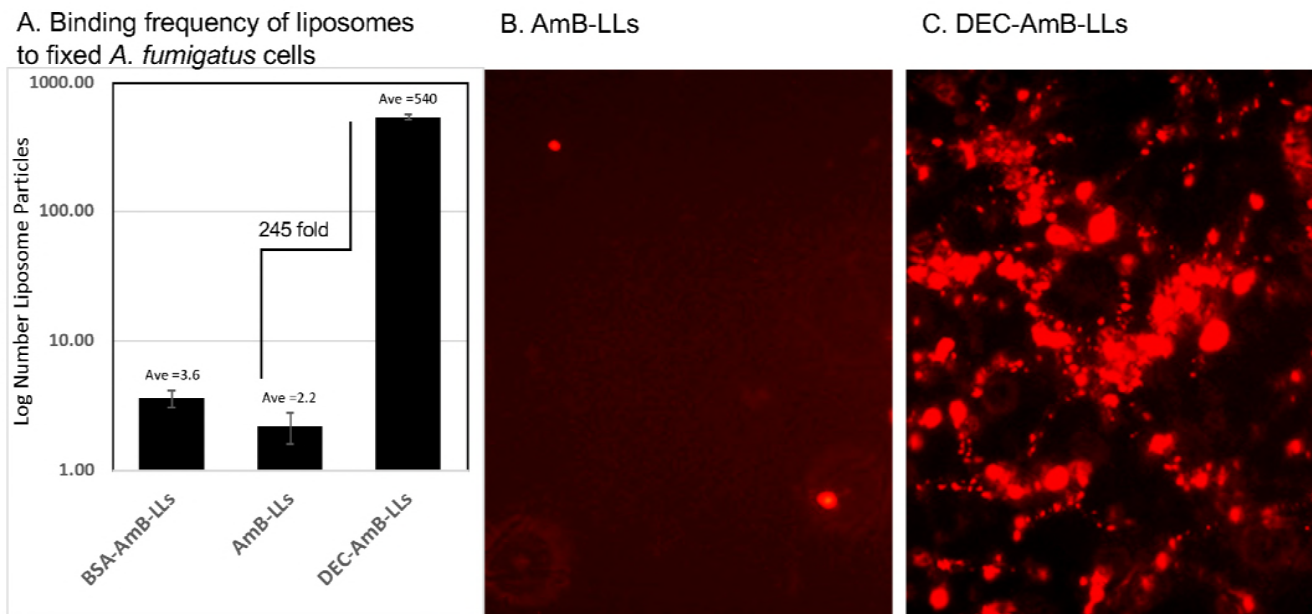

Fig. 4. Continued

D. Binding frequency of liposomes to live *A. fumigatus* cells

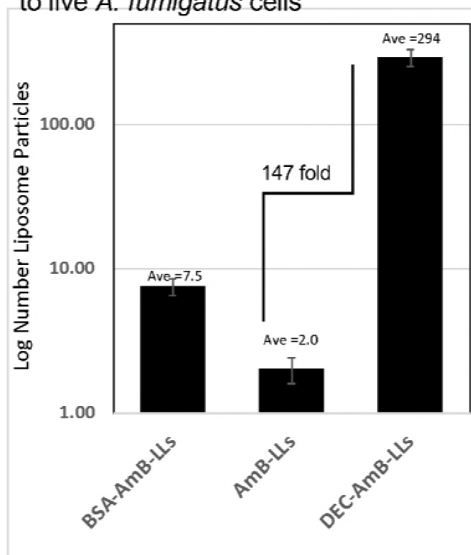

E. BSA-AmB-LLs

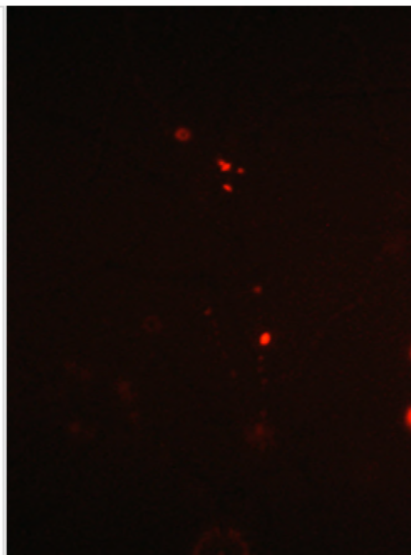

F. DEC-AmB-LLs

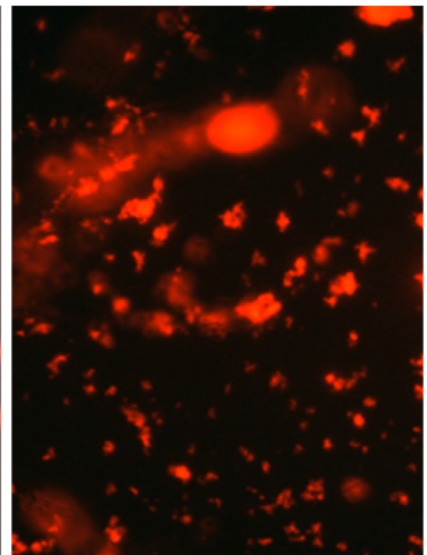

**Fig. 4. Continued**

**G. Laminarin inhibition of liposome binding**

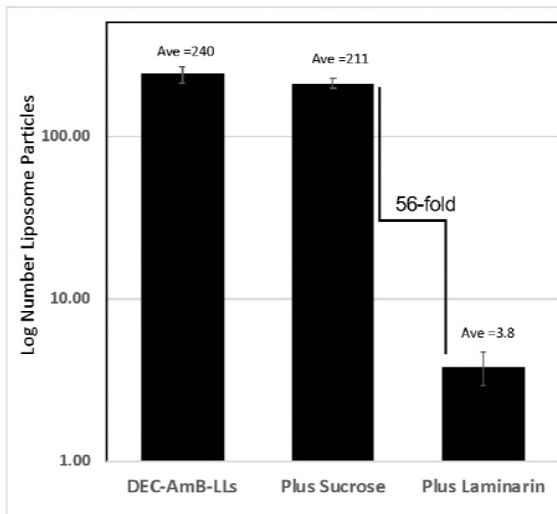

**H. DEC-AmB-LLs**

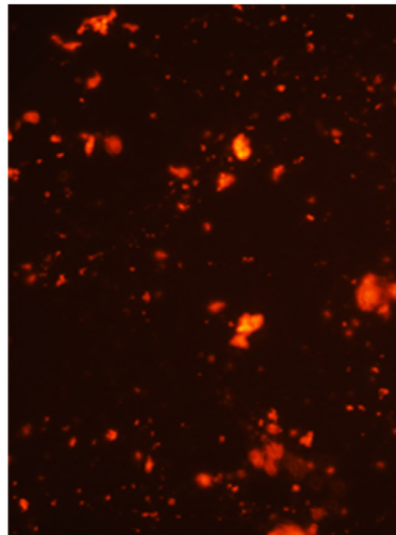

**I. DEC-AmB-LLs + Laminarin**

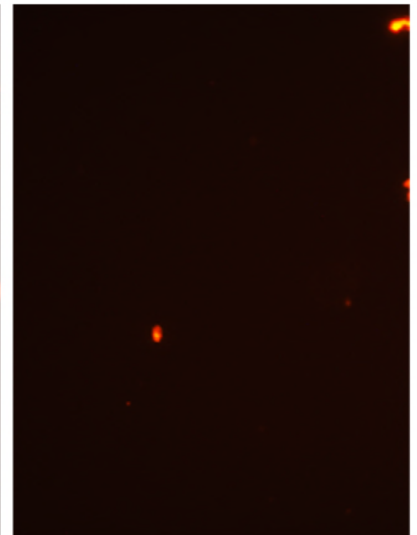



**Fig. 5. DEC-AmB-LLs inhibited the growth *A. fumigatus* far more efficiently than AmB-LLs.** Samples of 4,500 *A. fumigatus* conidia were germinated & grown in 96 well microtiter plates in Vogel's Minimal Media (VMM+1% glucose) for 8 to 56 hr at 35°C and treated at the same time with liposome preparations delivering the indicated concentrations of AmB to the growth media (A-D 3 uM AmB, a 1:300 fold dilution of all three liposome preparations), E. 0.09 uM, F. 0.18 uM, G. 0.9 to 3 uM) or an equivalent amount of liposome dilution buffer. Viability and growth were estimated using CellTiter-Blue reagent (A and C) or by measuring hyphal length (B & D) or by scoring percent germination (E, F, and G). Background fluorescence from wells with CellTiter-Blue reagent in the media, but lacking cells and liposomes was subtracted. Std. Errors are indicated. Inset photos in B and D show examples of the length of hyphae assayed for AmB-LLs and DEC-AmB-LL treated sample. One unit of hyphal length in B and D equals 5 microns. A and B and C and D compare the results from two biological replicate experiments with independently conjugated sDectin-1 and assembled liposomes.

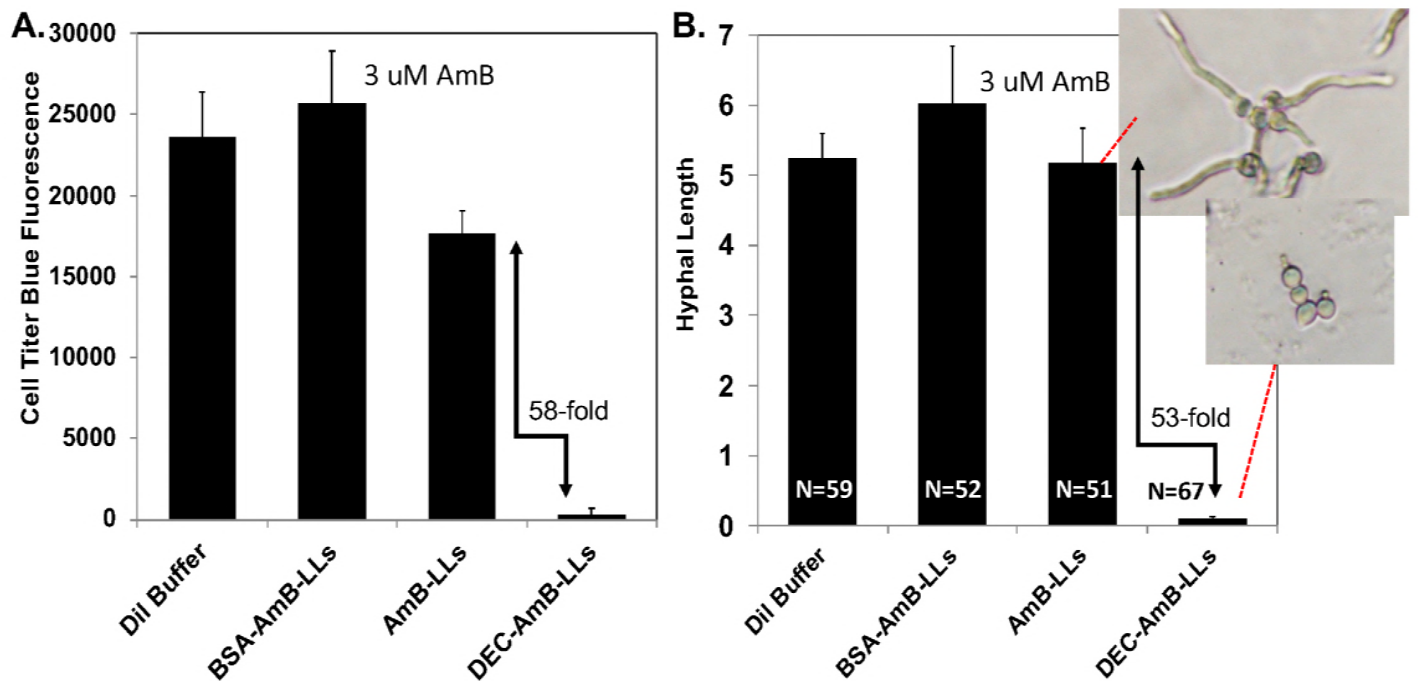

Fig. 5. Continued

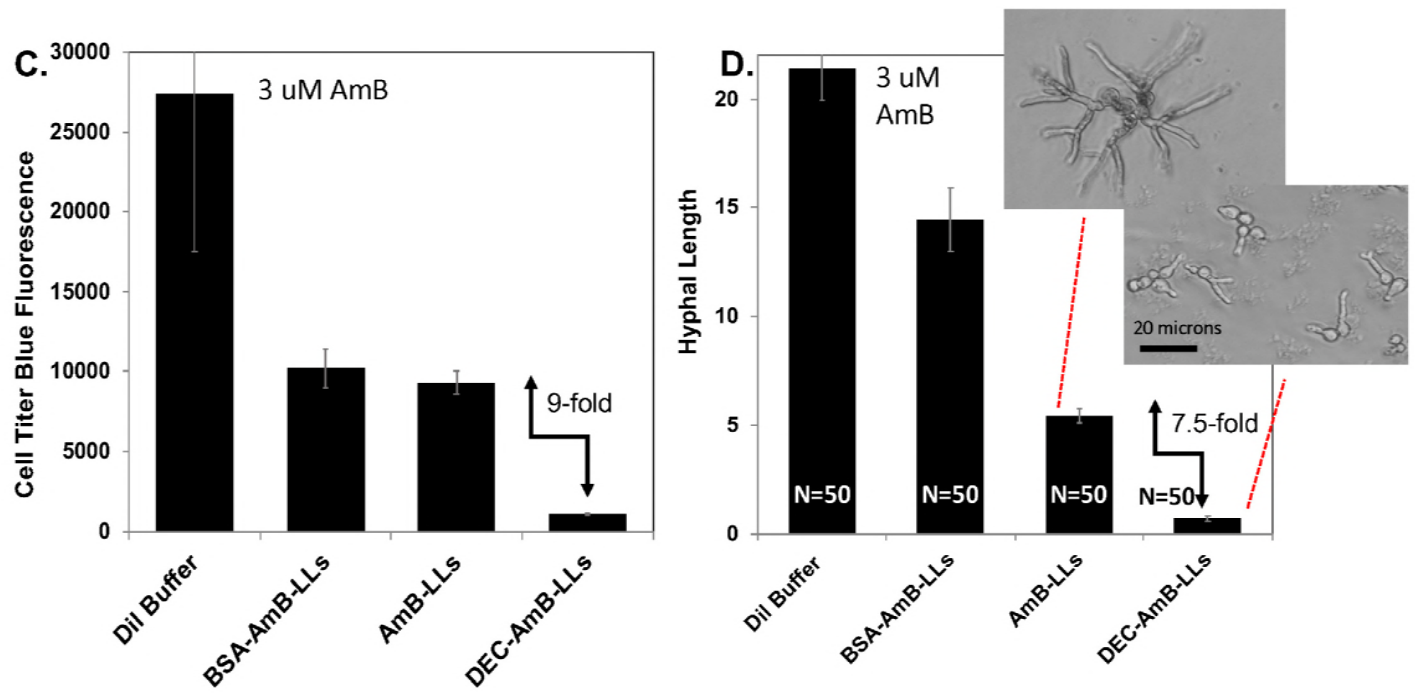

Fig. 5. Continued

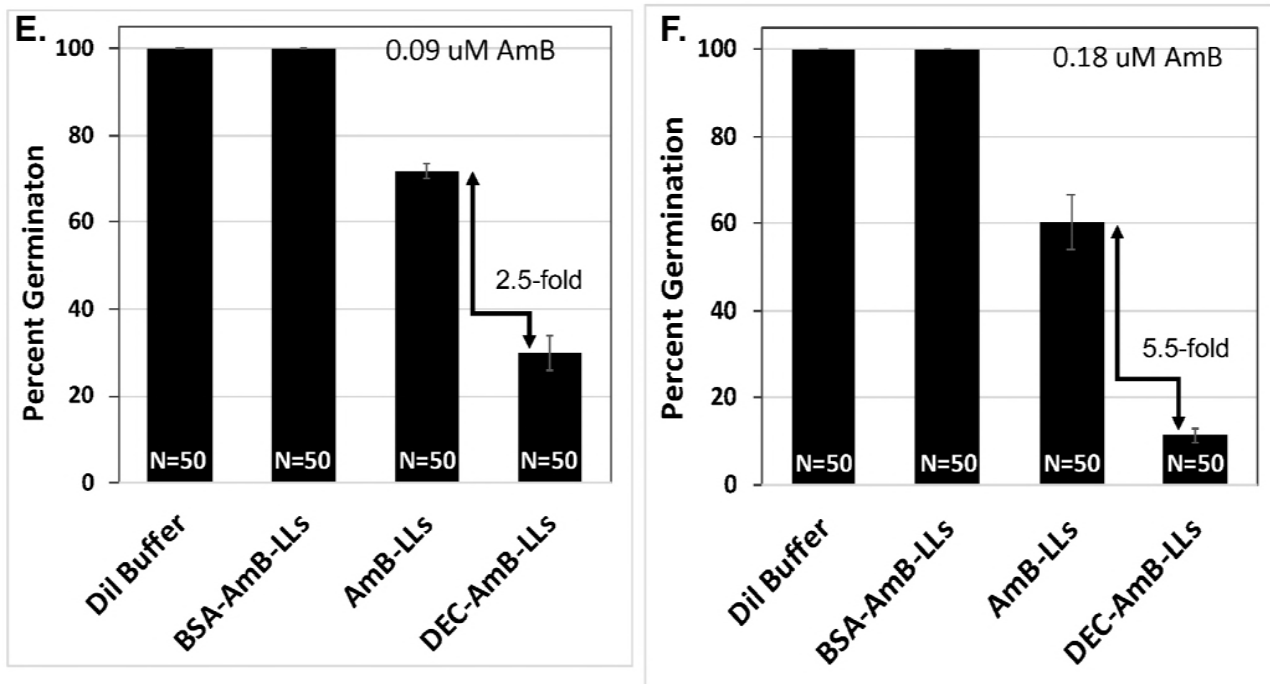

Fig. 5. Continued

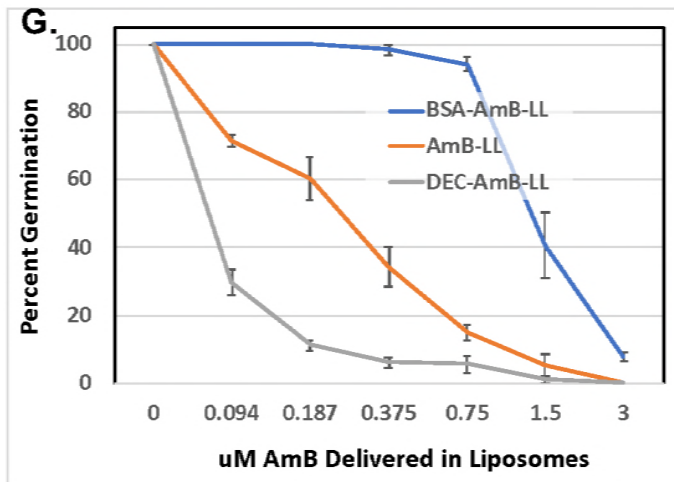

Source: https://www.biorxiv.org/content/10.1101/518043.full.pdf
